# Supplementary material for: Extracellular ATP and Imbalance of CD4+ T Cell Compartment in Pediatric COVID-19
Source: PubMed Central journal article supplement (PMC9157541; doi:10.3389/fcimb.2022.893044), 2022-05-18
Supplement: DataSheet_1.pdf [file DataSheet_1.pdf]

## Supplementary Figure 1

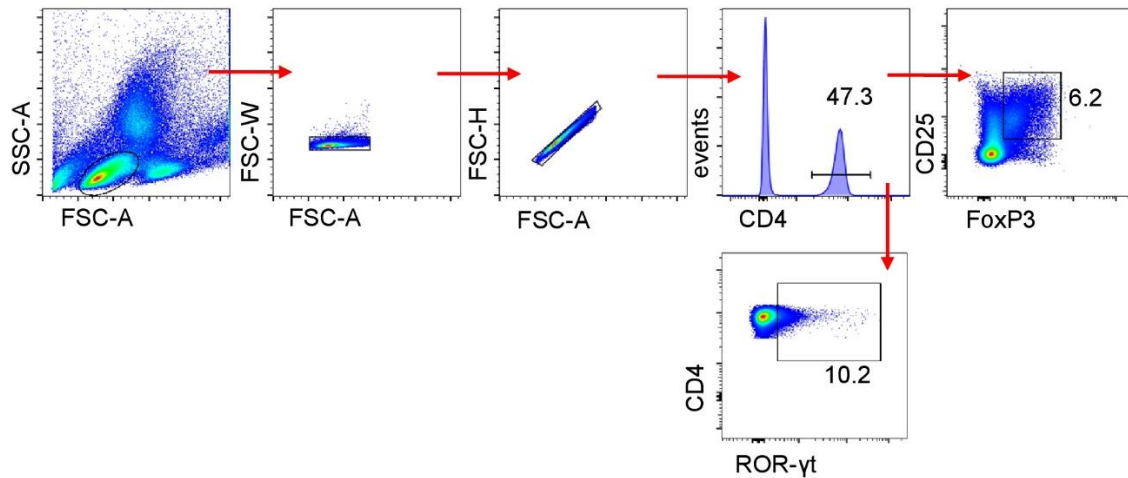

**Figure S1. Gating strategy.** Representative FACS profile showing the gating strategy for the analysis of Tregs and TH17 cells. Peripheral blood mononuclear cells ( $1 \times 10^6$ ) were stained with anti-CD4 and anti-CD25 IgG antibodies for 20 min at room temperature. Intracellular staining using anti-FOXP3 and anti-ROR- $\gamma$ t was performed on fixed and permeabilized cells. Data were acquired using a FACSCanto II (Becton Dickinson). FSC-A vs SSC-A allowed the preliminary identification of lymphocytes. Then, we selected singlets using FSC-A versus FSC-W and/or FSC-H parameters and CD4<sup>+</sup> T cells were selected from the singlet population using the anti-CD4 antibody. Tregs were defined as CD4<sup>+</sup>CD25<sup>+</sup>FoxP3<sup>+</sup>. TH17 cells were defined as CD4<sup>+</sup>ROR- $\gamma$ t<sup>+</sup>. A representative experiment is shown.
